# Supplementary material
Source: PubMed Central journal article supplement (PMC3038008)

## Supplement

**FIGURE 1.** Native gel electrophoresis of triplebody sctb 33-ds16-ds19, followed by immunoblot analysis (western blot) using an anti-his antibody for detection. Different quantities of the sctb preparation were loaded on a native poly-acrylamide gel. No immunoreactive aggregates were observed. Position of loading pockets marked.

Supplement Figure 1

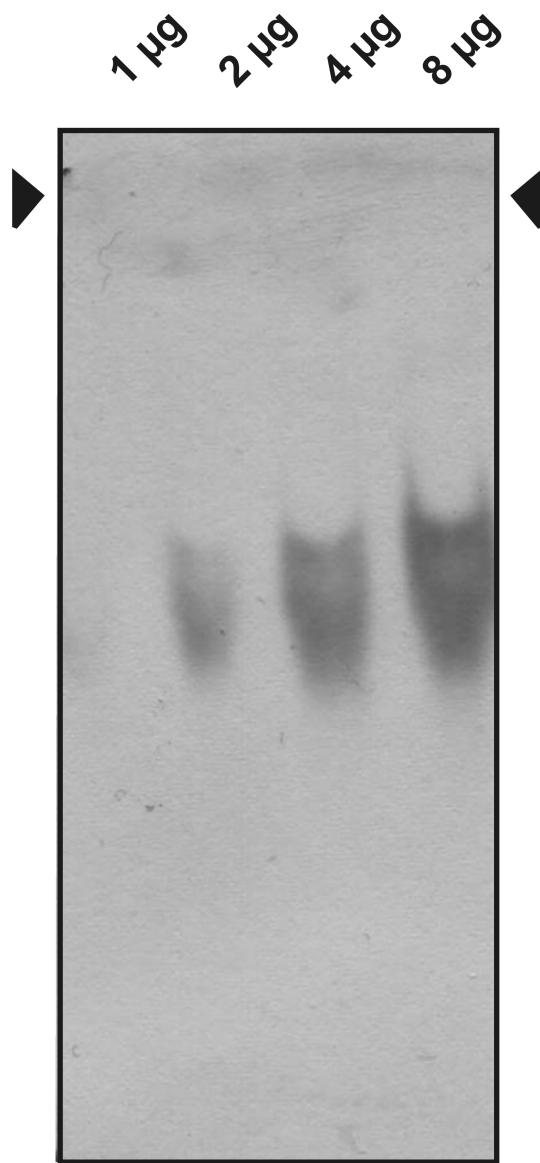

Supplement: mabs0301_0021SD1.pdf [file mabs0301_0021SD1.pdf]
